## Bystander cardiopulmonary resuscitation and survival in out-of-hospital cardiac arrest of non-cardiac origin

D.M. Christensen<sup>1</sup>, S. Rajan<sup>1</sup>, K. Kragholm<sup>2</sup>, K.B. Sondergaard<sup>1</sup>, O.M. Hansen<sup>2</sup>, T.A. Gerds<sup>3</sup>, C. Torp-Pedersen<sup>2</sup>, G.H. Gislason<sup>1</sup>, F.K. Lippert<sup>4</sup>, C.A. Barcella<sup>1</sup>

<sup>1</sup>Gentofte University Hospital, Department of Cardiology, Copenhagen, Denmark; <sup>2</sup>Aalborg University Hospital, Department of Cardiology, Aalborg, Denmark; <sup>3</sup>University of Copenhagen, Department of Biostatistics, Copenhagen, Denmark; <sup>4</sup>Emergency Medical Services, The Capital Region of Denmark, Copenhagen, Denmark

**Background:** Knowledge about the effect of bystander cardiopulmonary resuscitation (CPR) in out-of-hospital cardiac arrest (OHCA) of non-cardiac origin is lacking. We aimed to investigate the association between bystander CPR and survival in OHCA of presumed non-cardiac origin.

**Methods:** From the Danish Cardiac Arrest Registry and through linkage with national Danish healthcare registries we identified all adult patients with OHCA of presumed non-cardiac origin in Denmark (2001–2014). These were categorized further into OHCA of medical and non-medical cause. We analyzed temporal trends in bystander CPR and 30-day survival during the study period. Multiple logistic regression was used to examine the association between bystander CPR and 30-day survival and reported as standardized 30-day survival chances with versus without bystander CPR standardized to the prehospital OHCA-factors and patient characteristics of all patients in the study population.

**Results:** We identified 10,761 OHCA of presumed non-cardiac origin. Bystander CPR was associated with an increased 30-day survival chance of 3.4% (95% confidence interval [CI]: 2.9–3.9) versus 1.8% (95% CI: 1.4–2.2) with no bystander CPR, corresponding to a significant difference of 1.6% (95% CI: 0.9–2.3). During the study period, the overall bystander CPR rates increased from 13.6% (95% CI: 11.2–16.5) to 62.7% (95% CI: 60.2–65.2). 30-day survival increased overall from 1.3% (95% CI: 0.7–2.6) to 4.0% (95% CI: 3.1–5.2). Similar findings were observed in subgroups of medical and non-medical OHCA.

**Conclusion:** Bystander CPR was associated with a higher chance of 30-day survival among OHCA of presumed non-cardiac origin regardless of the underlying cause (medical/non-medical). Rates of bystander CPR and 30-day survival improved during the study period.

Table 1. Patient and arrest characteristics according to cause of out-of-hospital cardiac arrest

|                         | Overall     | Medical OHCA | Non-medical OHCA |
|-------------------------|-------------|--------------|------------------|
| Patient characteristics |             |              |                  |
| Total patients          | 10761       | 7625         | 3136             |
| Median age, y           | 67          | 70           | 50               |
| Male, n (%)             | 6357 (59.1) | 4154 (54.5)  | 2204 (70.4)      |
| OHCA factors            |             |              |                  |
| Witnessed arrest, n (%) | 4306 (40.0) | 3574 (46.9)  | 732 (23.3)       |
| Public location, n (%)  | 6979 (64.9) | 5494 (72.1)  | 1485 (47.4)      |

OHCA, out-of-hospital cardiac arrest; CPR, cardiopulmonary resuscitation.

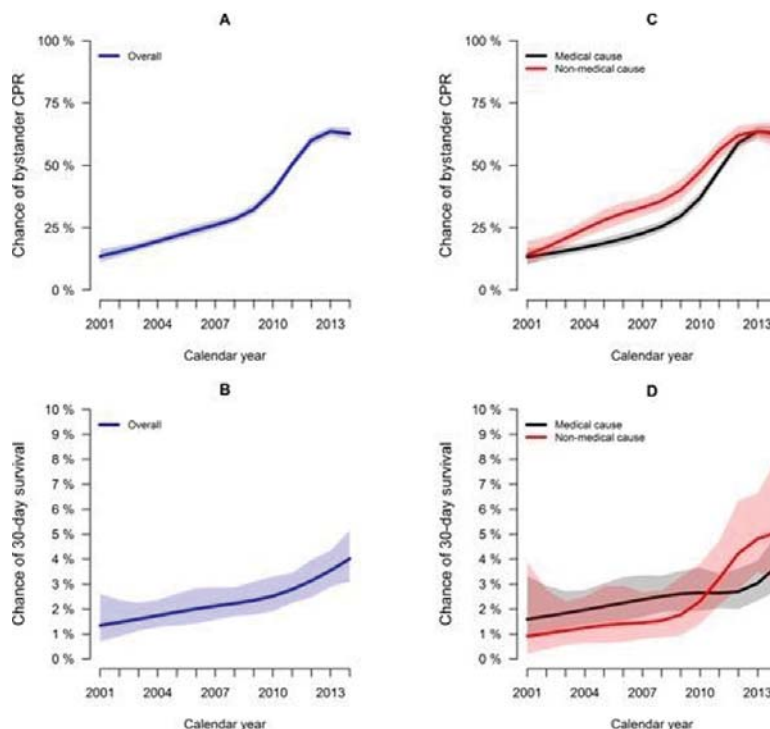

Figure 1. Temporal trends
